# Supplementary material for: Cathepsin B abundance, activity and microglial localisation in Alzheimer’s disease-Down syndrome and early onset Alzheimer’s disease; the role of elevated cystatin B
Source: PubMed Central journal article supplement (PMC10426223; doi:10.1186/s40478-023-01632-8), 2023-08-14
Supplement: 40478_2023_1632_MOESM1_ESM.pdf [file 40478_2023_1632_MOESM1_ESM.pdf]

Wu et al.,

**Cathepsin B abundance, activity and microglial localisation in Alzheimer's disease – Down syndrome and early onset Alzheimer's disease; the role of elevated cystatin B**

**Supplementary Data**

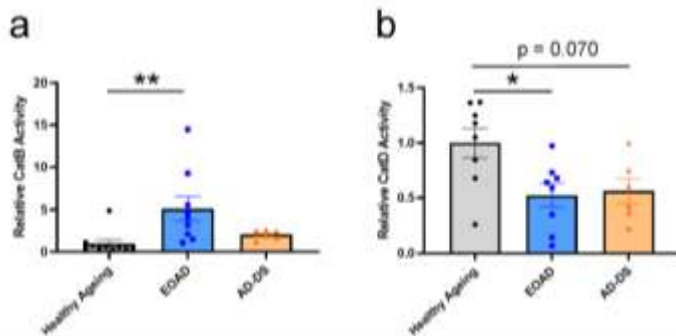

**Supplementary Figure 1 Changes to cathepsin B and cathepsin D activity in a sub analysis of EOAD and AD-DS Braak VI cases**

Sub-analysis of cathepsin B (a) and (b) cathepsin D activity in EOAD and AD-DS (Braak neurofibrillary tangle stage VI), and healthy-ageing. (a) Type of case affected cathepsin B activity (ANOVA  $F(2,17) = 6.792$ ,  $p = 0.007$ ); activity was significantly higher in individuals who had EOAD than in controls (pairwise comparisons with Bonferroni correction  $p = 0.008$ ), with no difference between individuals with AD-DS and control individuals (pairwise comparisons with Bonferroni correction  $p = 1.000$ ) or AD-DS and EOAD (pairwise comparisons with Bonferroni correction  $p = 0.115$ ). There was a trend that the age at the time of death (in years) has an impact on activity (ANOVA  $F(1,17) = 4.358$ ,  $p = 0.053$ ) (Healthy ageing  $n = 9$ , EOAD  $n = 9$ , AD-DS  $n = 6$ ). (b) Type of case (ANOVA  $F(2,14) = 7.188$ ,  $p = 0.007$ ) and age at death (ANOVA  $F(2,14) = 5.214$ ,  $p = 0.039$ ) significantly affected cathepsin D activity. Activity was significantly lower in individuals who had EOAD than in healthy controls (pairwise comparisons with Bonferroni correction  $p = 0.028$ ), a trend for reduced activity was observed between AD-DS and healthy ageing (pairwise comparisons with Bonferroni correction,  $p = 0.070$ ), with no difference in the activity between individuals with AD-DS and those with EOAD (pairwise comparisons  $p = 1.000$ ) (Healthy ageing  $n = 8$ , EOAD  $n = 8$ , AD-DS  $n = 6$ ). Individual data points are technical means for independent biological samples, error bars SEM. \*  $p < 0.05$  and \*\*  $p < 0.01$ .
